## TITLE PAGE

Title: Family-centered postnatal training and adherence to newborn care practices in district hospitals in two Indian states: A quasi-experimental intervention study

Sehj Kashyap MS<sup>a\*</sup>, and Amanda F. Spielman BS<sup>b\*</sup>, Nikhil Ramnarayan BA<sup>c</sup>, Sahana SD MS<sup>d</sup>, Rashmi Pant PhD<sup>e</sup>, Baljit Kaur MBBS<sup>f</sup>, Rajkumar N DNB<sup>g</sup>, Ramaswamy Premkumar PhD<sup>h</sup>, Shahed Alam MD<sup>c</sup>, Seema Murthy MPH<sup>d</sup>

\*Contributed equally to this work

<sup>a</sup> Duke University School of Medicine, Durham, NC, USA

<sup>b</sup> University of Miami, Miller School of Medicine, Miami, FL, USA

<sup>c</sup> Noora Health, San Francisco, CA, USA

<sup>d</sup> Aurora Health Innovations, Bangalore, India

<sup>e</sup> ShriSankhya Research, New Delhi, India

<sup>f</sup> Department of Health and Family Welfare, Government of Punjab, India

<sup>g</sup> Department of Health and Family Welfare, Government of Karnataka, India

<sup>h</sup> Independent Consultant, Vellore, India

Address correspondence to Seema Murthy, [s.m.seema@gmail.com](mailto:s.m.seema@gmail.com), +91 9980013325

Present address: G 507, Mantri Tranquil, Gubbalala, Bengaluru, Karnataka-560061

### Author Contribution:

S.K, N.R, S.D and Premkumar were involved in planning of the study and supervised the work. S.K,A.S and S.M drafted the manuscript. Pant performed the analysis, and wrote up the results. B.K, R and S.A conceptualised the intervention and gave critical input for the study. All authors discussed the results, commented on the manuscript and approved the final draft.

### Key Words:

Family caregivers, postnatal care, training, behavior, low- and middle-income countries (LMICs), Maternal-Child health services

Word Count: 3353

### Acknowledgements

We would like to thank colleagues from Ariadne Labs, Megan Marx Delaney, Lauren Bobanski, and Katherine Semrau, and Noora colleagues Shirley Yan and Arjun Rangarajan for their review and technical editing. Additionally, we would like to thank Tanmay Singh Pathani, Bhanu Pratap Yadav, Pradeep Kumar K, Anand Kumar, trainers from NHM and data collectors for coordinating data collection and permissions. Revised Standards for Quality Improvement Reporting Excellence (SQUIRE 2.0) publication guidelines guided the manuscript submission

### Competing Interests

S.K., A.S., N.R., S.A. were consultants of Noora Health at the time of this study and were compensated for the work on the study. S.A. is a co-founder of Noora Health. The authors have no financial interest to declare in relation to the content of this article.

**Funding:**

This research received no specific grant from any funding agency in the public, commercial or not-for-profit sectors

**Data Sharing:**

The data that support the findings of this study are available from the corresponding author, upon reasonable request.

**ABSTRACT**

**Background and Objectives:** Globally, 2.5 million newborns die within the first month of life annually. The majority of deaths occur in low- and middle-income countries (LMICs), and many of these deaths happen at home. The study assessed if the Care Companion Program (CCP) an in-hospital, skills-based training given to families improves post-discharge maternal and neonatal health outcomes.

**Methods:** This quasi-experimental pre-post intervention study design compared self-reported behavior and health outcomes among families before and after the CCP intervention. Intention to treat analysis included families regardless of their exposure to the intervention. Mixed effects logistic regression model, adjusted for confounders, was fit for all observations. Effects were expressed as Relative Risks (RR) with 95% Confidence Intervals (CI).

**Results:** At 2-weeks post-delivery, telephone surveys were conducted in the pre (n = 3510) and post-intervention (n = 1474) groups from 11 district hospitals in the states of Karnataka and Punjab. The practice of dry cord care improved significantly by 4%, (RR = 1.04, 95%CI [1.04,1.06]) and skin to skin care by 78% (RR=1.78, 95%CI [1.37,2.27]) in the post-intervention group as compared to pre-intervention group. Furthermore, newborn complications reduced by 16% (RR=0.84, 95%CI [0.76,0.91]), mother complications by 12% (RR=0.88, 95%CI [0.79,0.97]) and newborn readmissions by 56% (RR=0.44, 95%CI [0.31,0.61]). Outpatient visits

increased by 27% (RR=1.27, 95%CI [1.10,1.46]). However, outcomes of breastfeeding, mother's diet, hand-hygiene, and process indicator of being instructed on warning signs were not different.

**Conclusion:** Postnatal care should incorporate pre-discharge multi-pronged training of families to improve essential maternal and newborn care practices. The CCP model runs on a public-private partnership and is integrated into existing health systems. Our findings demonstrate that it is possible to improve outcomes through a family-centered approach in India. The CCP model can be integrated into formalised hospital processes to relieve overburdened healthcare systems in LMIC settings.

## **ARTICLE SUMMARY:**

### **Strengths and Limitations of this study:**

1. Study in 11 public health settings in 2 large Indian States and having large sample size
2. Multiple health behaviours measured post-discharge during the neonatal period
3. Quasi-experimental study design allows for historical control group in the same setting
4. Primary limitation is that all behaviours are self-reported
5. Random allocation was not feasible for this group intervention

## INTRODUCTION

1 Reducing neonatal morbidity and mortality remains a key goal of health systems in low-  
2 and middle-income countries (LMICs) where 2.5 million neonatal deaths occur annually[1].  
3 India bears 27% of the global burden of neonatal deaths; 750,000 newborns die in India within  
4 the first month of life annually[2].

5 Although institutional deliveries have nearly doubled in India over the past decade[3],  
6 inadequate follow-up has created several gaps in care. Families often miss coming back for  
7 scheduled follow-ups, with about 40% dropping out by the first follow-up visit in LMICs[4].  
8 Additionally, many patients fall through the safety net as health workers are not able to reach and  
9 provide care for the newborns at home[5]. Thus irrespective of the place of delivery, most  
10 neonatal deaths occur in the home setting[6]. For many families, facility-based childbirth is the  
11 only window of opportunity to equip families with the knowledge and skills needed to care for  
12 their newborns.

13 Postnatal education, particularly predischarge education has been identified as a “low-  
14 hanging fruit” to improve newborn outcomes and reduce mortality by improving the adoption of  
15 newborn care practices[7,8]. But key limitations have been identified in the implementation of  
16 such programs. The majority of programs focus on singular health topics, primarily  
17 breastfeeding, or impart education to only one family member, most often the mother. These  
18 limitations need to be overcome to address unmet educational needs[8].

19 Hospitals in LMICs can play a key role in imparting postnatal education[4], but without  
20 established procedures the delivery of critical health education in-hospital is limited or missed

21 altogether. A recent survey in district hospitals in India found less than half the mothers reported  
22 the receipt of any amount of education post-delivery and before discharge[8]. Moreover, low  
23 health literacy, socio-cultural diversity, power dynamics, and language barriers affect patient  
24 provider relationships, thereby adding to the difficulty in understanding the advice given by  
25 doctors and nurses. Often, families are not prepared for their roles as primary caregivers and  
26 essential newborn care practices that could save lives and avert suffering are not followed at  
27 home[9].

## 28 **Program Description**

29       Recently, eleven district hospitals in two states in India adopted a novel approach to  
30 patient education with families in hospitals being trained on essential newborn care, post-  
31 delivery. Noora Health inspired Care Companion Program (CCP) was implemented as a public-  
32 private partnership undertaking in two states of India. The program has an evidence-based  
33 curriculum for postnatal counselling, covering multiple behaviors for improving neonatal and  
34 maternal health[10] Skills to facilitate behavioral change and promote healthy outcomes are  
35 taught; they include family's understanding and practice of key healthy behaviors, healthcare  
36 system's support for family engagement, health care seeking by the families, and complications.  
37 Mothers and families are taught these skills in group sessions held in the hospitals.

38       Tools and methods to teach this curriculum were created using a human-centered design  
39 process including needs-finding interviews with families and discussions with local and regional  
40 health experts. The CCP trained nurses and counselors in the district hospitals primarily in health  
41 communication skills to engage their audiences[10]. Trainers were taught adult learning  
42 principles and methods of empathic medical communication. Train-the-trainer sessions took  
43 place over two 8-hour days. Visuals and materials were tailored to the cultural practices of local

44 populations using field testing, key informant interviews and iterative design. Final sign-off on  
45 the materials was granted by the Departments of Health in the respective states as well as District  
46 Surgeons and Medical Officers of each hospital. The materials included videos which are played  
47 on a television monitor installed in the postnatal wards, flipcharts, dolls for role-play, and hand-  
48 outs. A rotational district specific and ward specific roster was created in order to cover all  
49 deliveries and these trainers take turns in taking group classes for families.

50 The training session involved formal group sessions with families in postnatal wards. The  
51 frequency of these classes depended on patient turn-over-rates in the particular ward of the  
52 facility. For instance, the classes in postnatal wards of vaginal delivery mothers were more  
53 frequent (twice a week or more) than in cesarean section wards (once a week or more). On  
54 average, each facility ran 1-2 sessions per week. The primary SMART aim of the CCP is to  
55 improve patients' post-discharge outcomes, reduce complications and increase families'  
56 adherence to recommended newborn care practices. Our objective in the study was to assess the  
57 effect of CCP on family's reported adoption of newborn care practices and newborn outcomes in  
58 the neonatal period.

## 59 **METHODS**

### 60 **Study Design**

61 We conducted a quasi-experimental study where a pre-intervention group received  
62 standard of care (SoC) and served as an historical control and the post-intervention group  
63 receiving the CCP served as the intervention arm. All outcomes were self-reported by the mother  
64 or a primary caregiver who lived with the mother and were collected at 2-weeks post-delivery  
65 via telephone survey. We were interested in the overall effect of the program at the systems

66 level. Hence intention to treat analysis was applied so that families were included in the analysis  
67 regardless of their individual level of exposure to postnatal education.

68 Eleven district hospitals were selected by the governments of Punjab (5 hospitals) and  
69 Karnataka (6 hospitals) to launch the Care Companion Program as a pilot program in the state.  
70 These hospitals have delivery rates ranging from 100-800 deliveries per month and are the  
71 primary government hospitals in their respective districts.

72 Pilot district hospitals were selected based on need for the program as determined by the  
73 state governments and willingness among the district hospital leads to implement the program.  
74 The CCP was launched in July 2017 and by August 2017 all hospitals were running the CCP.  
75 Families in the pre intervention group were recruited between May and June 2017. And for the  
76 post intervention group, between August and October 2017.

## 77 **Sample**

78 Field investigators created a list of deliveries each day referencing the hospital's delivery  
79 registers. Using survey software, we selected a random sample of women who delivered a  
80 newborn in the hospital during the study timeframe. Field investigators checked for inclusion and  
81 exclusion criterion by talking to the families and using individual patients' chart data and  
82 developed a final list. The study was powered to detect a 19% improvement in exclusive breast  
83 feeding (EBF) practices at 6-weeks. Assuming 30% EBF at 6-weeks for the SoC group, to detect  
84 19% improvement in EBF at 6-weeks for the CCP group, a sample size of at least 1425  
85 participants in each group would be sufficient at 5% level with 90% power.

## 86 **Inclusion and exclusion criteria**

87 All women who delivered a live newborn in the selected district hospitals during the  
88 study recruitment were eligible and included in the study sampling frame. Families were

89 excluded from participating if baby or mother died during hospital stay or by the time of the  
90 survey call, mother was younger than 18 years, no one living near the mother had access to a  
91 telephone, no one living with the mother spoke one of the multiple languages the surveyors  
92 spoke, mother or baby were transferred to another hospital during their stay in the hospital,  
93 medicolegal cases and if the mother left the hospital before data collectors could collect  
94 telephone numbers.

### 95 **Ethics and consent**

96 Participants provided oral informed consent in their primary language for participation.  
97 All surveys were recorded. The study was approved after review by local health authorities. ACE  
98 Independent Ethics Committee, (DCGI Reg. No. ECR/141/Indt/KA/2013) provided approval for  
99 the study.

### 100 **Patient and public involvement**

101 Study questionnaires were piloted with the target population prior to the start of study  
102 data collection and based on the pilot feedback. The instrument was fine-tuned for the comfort  
103 and understanding of the patient population.

104 Once published, participants will be informed of the results through a dedicated section in  
105 the website ([www.noorahhealth.org](http://www.noorahhealth.org)), each hospital involved will be sent the results and the  
106 Government stakeholders at the state level will be informed.

### 107 **Measurements**

108 Population based surveys like the Demographic and Health Survey [11] and National  
109 Family Health Survey [12] collect limited data about newborn care practices and neonatal and  
110 post-partum maternal health, only measuring breastfeeding practice and the occurrence of  
111 excessive vaginal bleeding or fever in the postpartum period. The study team developed and



112 tested a phone-survey to additionally measure other newborn care practices that are shown to  
113 reduce newborn illness and death: skin to skin care, exclusive breastfeeding, infection prevention  
114 including handwashing and clean umbilical cord care, and care seeking for newborn illness. In  
115 addition, we chose to measure receipt of post-delivery instructions and problems like  
116 hospitalization and readmissions.

117         A phone-survey was developed in English and translated into Kannada, Hindi and  
118 Punjabi by certified translators. Given all measures were self-reported, several techniques were  
119 employed in the design of the survey to minimize desirability bias and recall bias: open-ended  
120 questions, small recall periods and specific question ordering. Where there was overlap in  
121 measurement, questions about EBF and postpartum complications were adapted from the NFHS  
122 and DHS surveys. The translated surveys were evaluated for face and content validity by survey  
123 managers fluent in the language and familiar with the study aims. Subsequently, the survey was  
124 tested with 20 families for understandability. Lastly, the survey was backtranslated by the study  
125 team that was bilingual and assessed.

126         The survey was electronically programmed into SurveyCTO, a tool for digital data  
127 collection. Required responses, response validity checks and skip patterns were used to ensure  
128 completeness of data; thus, only missing data occurred when a survey respondent abandoned the  
129 survey. In addition, survey phone calls were recorded with permission of families and one survey  
130 per investigator was audited daily by survey managers for survey response accuracy and quality.  
131 Families were asked to provide 2 phone numbers and preferred time of calling. Phone calls were  
132 made for 5-7 consecutive days, before classifying them as not contactable. The primary outcome  
133 measures are described in Table 1. Confounders measured were age of the mother, sex of the

- 134 baby, whether the baby was premature or not, education of the mother, birth weight less than  
135 2500 gms, parity, delivery type and whether the baby was sent to SNCU.

Table 1: Self-reported outcomes assessed at two-weeks post-delivery

|                   |                                                                                                                                                              |                                                                                                                                                                                                                                                            |
|-------------------|--------------------------------------------------------------------------------------------------------------------------------------------------------------|------------------------------------------------------------------------------------------------------------------------------------------------------------------------------------------------------------------------------------------------------------|
| Healthy behaviors | Baby exclusively breastfeed in the past 24 hours                                                                                                             | [Yes] If family reported only feeding breastmilk in the previous 24 hours                                                                                                                                                                                  |
|                   |                                                                                                                                                              | [No] If family reported feeding anything else                                                                                                                                                                                                              |
|                   | Proper umbilical cord care (nothing on cord) since birth                                                                                                     | [Yes] If family applied nothing or only ointment/powder provided by doctor                                                                                                                                                                                 |
|                   |                                                                                                                                                              | [No] For all other situations                                                                                                                                                                                                                              |
|                   | Home practice of skin-to-skin care for any duration as described by baby without clothes (with/without diaper) being placed prone on the mother's bare chest | [Yes] If family reported being aware of skin-to-skin care and any member practicing it with the baby at home                                                                                                                                               |
|                   |                                                                                                                                                              | [No] If the family was not aware or had not practiced it at home                                                                                                                                                                                           |
|                   | Handwashing as measured by use of soap                                                                                                                       | [Yes] If family reported (unprompted) using soap when washing their hands                                                                                                                                                                                  |
|                   |                                                                                                                                                              | [No] Does not use soap                                                                                                                                                                                                                                     |
|                   | Unrestricted maternal diet (no restriction of specific foods, no restriction on total quantity of food or water)                                             | [Yes] If the mother had not restricted either food or water after delivery                                                                                                                                                                                 |
|                   |                                                                                                                                                              | [No] If the mother had decreased either food or water                                                                                                                                                                                                      |
| Complications     | Mother Complication                                                                                                                                          | [Yes] If mother reported any of the following: <ul style="list-style-type: none"> <li>▫ Fever Pus or redness from the caesarean section site or vaginal episiotomy area</li> <li>▫ Swelling or pain in the breast</li> </ul> [No] For all other situations |

|                    |                                                              |                                                                                                                                                                                                                                                                                      |      |
|--------------------|--------------------------------------------------------------|--------------------------------------------------------------------------------------------------------------------------------------------------------------------------------------------------------------------------------------------------------------------------------------|------|
|                    | Baby Complication                                            | <p>[Yes] If baby experienced any of the following:</p> <ul style="list-style-type: none"> <li>• Fever, cough</li> <li>• Umbilical problem (pus or redness)</li> <li>• Sustained inactivity or inconsolable crying or refusal to feed</li> </ul> <p>[No] For all other situations</p> |      |
| Healthcare seeking | Baby ever readmitted to hospital post-discharge              | [Yes]                                                                                                                                                                                                                                                                                | [No] |
|                    | Baby ever taken to a clinic or hospital for outpatient visit | [Yes]                                                                                                                                                                                                                                                                                | [No] |

136

## 137 **Data Analysis**

138 Description of the maternal and child socio-demographic characteristics and confounding  
139 variables such as birth weight, gender of baby, whether the delivery was premature, whether it  
140 was first pregnancy and whether delivery was through C-section was done using frequencies and  
141 percentages. Chi-square test for independence of characteristics between the two intervention  
142 phases was used to test significance at 5% level. Logistic regression models with bootstrap  
143 standard error were used to assess the effect of intervention on odds of outcome. In the first step,  
144 a null model was fit with no predictors. Then models were fit separately for each outcome  
145 specified in Table 1 with the intervention group as the primary independent variable and adjusted  
146 for confounders. All models were executed for the full sample. Model information efficiency  
147 was compared using Akaike's information criterion (AIC). Effect estimates were in terms of risk  
148 ratios which were calculated from odds ratios and significance was reported at 95% confidence.

149

## **RESULTS**

150 We collected 1,507 survey responses from the control families receiving SoC before the  
151 launch of the CCP and 3,634 responses from the intervention families in the CCP group. Out of  
152 the two selected states, more respondents from Karnataka were in the SoC group (57.4%) as well  
153 as the CCP group (68.9%).

154 Participant demographics are detailed in Table 2. Overall, mother's age distribution, first  
155 pregnancy, type of delivery, baby's gender, birth weight (<2500g), and preterm status were  
156 similar between the two groups. Further, mother's educational attainment was significantly  
157 different ( $p=0.01$ ) in both phases. However, when combining the education categories, the counts  
158 were not statistically different with approximately 1273 (86.3%) of participants in the pre-

159 intervention group with no schooling and 3125 (89%) participants in the post-intervention group  
 160 with some schooling. In each intervention group, almost fifty percent had attained schooling up  
 161 to the 6-10th grade category.

Table 2: Basic demographic characteristics of participants

| Characteristics            | Pre-intervention (SoC*) |      | Post-intervention (CCP†) |      | P Value‡ |
|----------------------------|-------------------------|------|--------------------------|------|----------|
|                            | N                       | %    | N                        | %    |          |
|                            | 1474                    |      | 3510                     |      |          |
| Mother age (years)         |                         |      |                          |      | 0.055    |
| 0-18                       | 4                       | 0.3  | 34                       | 1.0  |          |
| 19-25                      | 1036                    | 70.3 | 2493                     | 71.0 |          |
| 26-30                      | 364                     | 24.7 | 817                      | 23.3 |          |
| 31-40                      | 70                      | 4.7  | 166                      | 4.7  |          |
| Mother education           |                         |      |                          |      | 0.01     |
| No education               | 201                     | 13.6 | 385                      | 11.0 |          |
| 1-5 grade                  | 124                     | 8.4  | 272                      | 7.7  |          |
| 6-10 grade                 | 725                     | 49.2 | 1741                     | 49.6 |          |
| 11-12 grade                | 297                     | 20.1 | 761                      | 21.7 |          |
| Graduate                   | 112                     | 7.6  | 331                      | 9.4  |          |
| Other/Refused              | 15                      | 1.0  | 20                       | 0.6  |          |
| Male baby                  | 778                     | 52.8 | 1855                     | 52.8 | 0.99     |
| Premature (<37 weeks)      | 306                     | 20.8 | 701                      | 20.0 | 0.553    |
| Low Birth Weight (<2500 g) | 461                     | 31.3 | 1125                     | 32.1 | 0.615    |
| C-Section delivery         | 720                     | 48.8 | 1649                     | 47.0 | 0.241    |
| First pregnancy            | 721                     | 48.9 | 1626                     | 46.3 | 0.101    |

\*SOC, Standard of Care; †Care Companion Program

‡ p-values are from chi-square test of independence

162 The unadjusted and adjusted risk ratios for outcomes in the CCP group compared with the SoC  
 163 group is shown in Table 3 and the adjusted risk ratios in Figure 1.

Table 3: Risk ratios for the post-intervention CCP group as compared to the pre-intervention SoC group

| Outcomes                                | SoC* N (%)      | CCP† N (%)      | Risk Ratio |           | 95% CI‡             |
|-----------------------------------------|-----------------|-----------------|------------|-----------|---------------------|
|                                         | 1474            | 3510            | Unadjusted | Adjusted‡ |                     |
| Health systems engagement -instructions |                 |                 |            |           |                     |
| Baby care                               | 482<br>(32.70)  | 1268<br>(36.13) | 1.10       | 1.10      | <b>(1.01,1.19)†</b> |
| Warning Signs                           | 428<br>(29.04)  | 1171<br>(33.36) | 1.15       | 1.08      | (0.97,1.18)         |
| Healthy behaviors                       |                 |                 |            |           |                     |
| Exclusive breast feeding                | 1232<br>(83.58) | 3076<br>(87.64) | 1.05       | 1.02      | (0.99,1.04)         |
| Skin to skin care                       | 71<br>(4.82)    | 324<br>(9.23)   | 1.92       | 1.78      | <b>(1.37,2.27)†</b> |
| Dry cord care                           | 1292<br>(87.65) | 3201<br>(91.20) | 1.04       | 1.04      | <b>(1.02,1.06)†</b> |
| Mother's diet                           | 449<br>(30.46)  | 1083<br>(30.85) | 1.01       | 1.03      | (0.94,1.13)         |
| Hand hygiene                            | 1150<br>(78.02) | 2666<br>(75.95) | 0.97       | 0.98      | (0.94,1.01)         |
| Healthcare seeking                      |                 |                 |            |           |                     |
| Readmission                             | 70<br>(4.75)    | 78<br>(2.22)    | 0.47       | 0.44      | <b>(0.31,0.61)†</b> |
| Outpatient visits                       | 218<br>(14.81)  | 658<br>(18.76)  | 1.27       | 1.27      | <b>(1.10,1.46)†</b> |

| Outcomes      | SoC* N (%)     | CCP† N (%)      | Risk Ratio |      | 95% CI‡      |
|---------------|----------------|-----------------|------------|------|--------------|
| Complications |                |                 |            |      |              |
| Newborn       | 553<br>(37.52) | 1065<br>(30.34) | 0.81       | 0.84 | (0.76,0.91)¶ |
| Mother        | 464<br>(31.48) | 935<br>(26.64)  | 0.85       | 0.88 | (0.79,0.97)¶ |

\*SOC, Standard of Care; †CCP, C2are Companion Program

‡ CI, Confidence Interval of adjusted risk ratio.

‡Adjusted for age and educational status of mother, gender of baby, prematurity, low birth weight (<2500 grams), gravida and type of delivery

¶ Significant with confidence interval not including null value

164 Figure 1:

165

166 **Health systems engagement -instructions**

167 Ten percent of participants in the CCP group were significantly more likely to have  
 168 received baby care instructions (RR=1.10 (95 % CI = (1.01, 1.19))). Respondents did not report  
 169 any differences between the two groups on instructions on baby warning signs.

170 **Healthy behaviors**

171 Further, we examined healthy behaviors and found, participants in the CCP group were  
 172 more likely to exclusively breastfeed (2%), 78% more likely to adopt kangaroo care practices,  
 173 4% more likely to practice dry cord care, and 3% more likely to have unrestricted diet than those  
 174 in the SoC group. However, the uptake of hand hygiene was 3% lower in the CCP group. Of  
 175 these health behaviors, only skin to skin care (adjRR=1.78, 95%CI=1.37,2.27) and dry cord care  
 176 (adjRR=1.04, 95%CI=1.02,1.06) showed statistically significant improvements (Table 3).

177 **Healthcare seeking**

178 Health seeking behaviors were significantly improved in the CCP group compared to the  
 179 SoC group. Outpatient visits were 27% (95% CI=(1.10,1.46)) more likely in the CCP group.



180 Readmissions in the newborn, adjusted for confounders, were 56% (95% CI=(0.31,0.61)) lower  
181 in the CCP group.

## 182 **Complications**

183 The overall risk of mother or newborn complications reduced significantly in CCP group  
184 as compared to SoC group. Risk of newborn complications was reduced by 16% (adjRR=0.84,  
185 95% CI=(0.76,0.91)) and mother complications by 12% (adjRR=0.88, 95% CI=(0.79,0.97)).

## 186 **DISCUSSION**

### 187 **Summary**

188 This study explored the feasibility and effectiveness of a hospital-run, family-focused  
189 training program that provides education on multiple evidence-based newborn care practices.  
190 Our findings indicate that participation in the in-hospital program was associated with an  
191 increase in the uptake of multiple key newborn care practices and health seeking behaviors.  
192 The Care Companion Program incorporates postnatal care principles to facilitate the transfer of  
193 healthy practices during the critical window of newborn care. Our study showed positive  
194 behavior uptake in the right direction for all behaviors except handwashing. However, only  
195 behavioral changes associated with skin-to-skin care (RR=1.78, 95%CI=1.37,2.27) and dry cord  
196 care (RR=1.04, 95%CI=1.02,1.06) were significant.

### 197 **Interpretation**

198 The prevalence of dry cord care in several studies from community settings in India  
199 varied from 49% to 72%[4]. Our study showed a much higher prior prevalence at 88%, even  
200 before the intervention; this may be because it consisted of only hospital delivered populations.  
201 Our skin to skin care was very low in the SoC group at about 5% as compared to other studies in  
202 rural India reporting 15%[13]. The reason for this difference is because unlike other studies we

203 measured this practice only after discharge and did not include in-hospital behaviors. We also  
204 saw a high uptake of skin-to-skin care as compared to other behaviors. One reason could be that  
205 in most hospitals, skin to skin care is promoted only for premature and low birth weight babies,  
206 whereas our training included this for all babies. Breastfeeding levels were high at baseline and  
207 did not show change with CCP. This may be due to a ceiling effect as most women were already  
208 breastfeeding. However, we did not observe this ceiling effect with dry cord care.  
209 Importantly, our study showed significant reductions in self-reported neonatal and mother  
210 complications with the adjusted risk ratios at 16% and 12%, respectively. Readmissions in the  
211 newborn were reduced by 56% after controlling for other variables. Improved and probably  
212 timely care seeking, as reported by increased outpatient visits, increased by 27% in the CCP  
213 group; this may be associated and partially responsible for the reduced readmissions.

214         Within India, newborn practices vary and often are related to cultural and religious  
215 beliefs. Involvement of entire families allows for easier adoption as additional family members  
216 influence uptake[13]. Yet, a comprehensive review of 77 studies in LMICs, of educational  
217 strategies for postnatal care, reveals no interventions have considered the involvement of family  
218 members beyond the parents[4].The family centered care (FCC) model is useful in discharge  
219 planning by equipping families with essential newborn health skills and improving newborn  
220 outcomes[14].

221         The CCP sessions are held with groups of families and the program emphasizes the  
222 ability of family members to learn together and practice multiple high-impact health skills. The  
223 CCP taps into the collectivist mindset increasing willingness to learn during life events[15]  
224 Hospital staff also are able to address any concerns and answer questions during training  
225 sessions, which allows for increased engagement and group discussion of difficult care practices.

226 Within overburdened care settings, educational interventions face implementation challenges due  
227 to limited availability of healthcare workers. The streamlined CCP design with rotation of staff  
228 conducting sessions coupled with group classes alleviates the burden of individual and repetitive  
229 counseling. In hospital postnatal education using existing resources can be cost effective  
230 compared to community outreach. The in-hospital setting is often the only form of newborn  
231 education families receive and prevents missed opportunities to deliver comprehensive  
232 information on newborn care[5]. The multi-topic curriculum can be delivered using multiple  
233 modalities to target caregiver activation during hospital stays and can improve neonatal  
234 outcomes.

### 235 **Strengths and Limitations**

236 The primary strengths of our study are its large sample size, measurement of multiple  
237 health behaviors and representation of public health settings spanning eleven hospitals in two  
238 states. Prior studies evaluating hospital-based postnatal programs have been evaluated in single  
239 sites with small sample sizes or only assessed impact of education on single behaviors like  
240 breastfeeding. Additionally, this study took place in district hospitals which account for a large  
241 proportion of deliveries occurring in government run facilities.

242 Despite these strengths, there are important limitations to this study. They include the  
243 lack of a pre-validated survey and self-reported data. Regarding self-report, there is a chance that  
244 people can over-report positive behaviors, but this bias would be expected in both groups.  
245 Additionally, our measurement of behaviors could have been improved through in-person  
246 assessments and audits of behaviors to verify self-report behavior. However, this was not  
247 feasible due to resource constraints.

248 While some would argue that a quasi-experimental design could be considered a  
249 limitation, we disagree. Our study used an historical control group based on the standard of care  
250 and in a close timeframe to the intervention. Further, the control group was drawn from the  
251 same setting as the interventional arm. Additionally, at the time of our study, no other education  
252 improvement or patient counselling efforts were initiated, nor any new programs launched  
253 during the duration of the study in any hospital except for one hospital that successfully gained  
254 quality improvement accreditation.

255 Exclusion of mother-baby dyads of families who did not own a phone, were transferred  
256 or left the hospital before a data collector could approach them accounted for less than five  
257 percent of families. Therefore, we do not consider this to be a significant group. Telephone  
258 access was high so almost no families were excluded for this reason. Another point to consider is  
259 that while healthy dyads are more likely to leave the hospital quickly, making our population less  
260 healthy, the factors pulling it in the opposite direction were sicker dyads being more likely to be  
261 transferred. Therefore, we felt the data were balanced in this way.

262 Most importantly, we conducted the same procedures for data collection before and after  
263 the intervention with the same factors affecting both our groups; hence, our results should reflect  
264 the population and not be biased.

## 265 **Conclusions**

266 This study demonstrated an in-hospital postnatal education program can effectively cover  
267 multiple newborn care practices and improve outcomes through a family-centered approach. This  
268 is a key finding that can enlighten further efforts to design and evaluate improved postnatal  
269 education programs in healthcare settings, particularly in LIMCs. Positive behavior change  
270 varied with different behaviors. There is an opportunity for the ongoing program evaluation to

271 allow replication to promote caregiver uptake of newborn care practices following hospital  
272 discharge.

273           The CCP model lends itself for use in LMIC hospital settings, especially where there are  
274 supportive family structures for chronic health conditions or where the family is the most  
275 consistent factor in the patient’s life and well-being. The simple yet engaging training  
276 infrastructure can be integrated into formalized hospital processes as a way to relieve  
277 overburdened healthcare systems from downstream complications. The program equips family  
278 members with skills that will benefit the patient and enable caregivers to view their roles as an  
279 essential component of care delivery.

## REFERENCES

- 1 United Nation. Levels & Trends in child Mortality, Report 2019. UNICEF: UN Inter-agency Group for Child Mortality Estimation 2019. <https://www.unicef.org/reports/levels-and-trends-child-mortality-report-2019>
- 2 Khurmi M, Karpe V, Kaur P. India launches India newborn action plan. *Indian J Child Health* 2015;**02**. doi:10.32677/IJCH.2015.v02.i01.015
- 3 Joe W, Perkins JM, Kumar S, *et al*. Institutional delivery in India, 2004-14: unravelling the equity-enhancing contributions of the public sector. *Health Policy Plan* 2018;**33**:645–53. doi:10.1093/heapol/czy029
- 4 Dol J, Campbell-Yeo M, Tomblin Murphy G, *et al*. Parent-targeted postnatal educational interventions in low and middle-income countries: A scoping review and critical analysis. *Int J Nurs Stud* 2019;**94**:60–73. doi:10.1016/j.ijnurstu.2019.03.011

- 5 Neogi SB, Sharma J, Chauhan M, *et al.* Care of newborn in the community and at home. *J Perinatol Off J Calif Perinat Assoc* 2016;**36**:S13–7. doi:10.1038/jp.2016.185
- 6 Sines E, Syed U, Wall S, *et al.* Postnatal Care: A Critical Opportunity to Save Mothers and Newborns. *Policy Perspect Newborn Health-Sav Newborns Lives* 2007.
- 7 Darmstadt GL, Bhutta ZA, Cousens S, *et al.* Evidence-based, cost-effective interventions: how many newborn babies can we save? *Lancet Lond Engl* 2005;**365**:977–88. doi:10.1016/S0140-6736(05)71088-6
- 8 Subramanian L, Murthy S, Bogam P, *et al.* Just-in-time postnatal education programmes to improve newborn care practices: needs and opportunities in low-resource settings. *BMJ Glob Health* 2020;**5**:e002660. doi:10.1136/bmjgh-2020-002660
- 9 The Lancet Child Adolescent Health. Putting the family at the centre of newborn health. *Lancet Child Adolesc Health* 2019;**3**:1. doi:10.1016/S2352-4642(18)30369-9
- 10 World Health Organization. *WHO recommendations on postnatal care of the mother and newborn*. Geneva: : World Health Organization 2013.
- 11 USAID. Demographic and Health Survey (DHS). DHS Programs- Demogr. Health Surv. <https://dhsprogram.com/Methodology/Survey-Types/DHS.cfm> (accessed 15 Feb 2021).
- 12 International Institute for Population Sciences (IIPS). National Family Health Survey (NFHS-5), 2019-20: India. Mumbai: IIPS. 2020.
- 13 Abdulghani N, Edvardsson K, Amir LH. Worldwide prevalence of mother-infant skin-to-skin contact after vaginal birth: A systematic review. *PloS One* 2018;**13**:e0205696–e0205696. doi:10.1371/journal.pone.0205696

- 14 Verma A, Maria A, Pandey RM, *et al.* Family-centered care to complement care of sick newborns: A randomized controlled trial. *Indian Pediatr* 2017;**54**:455–9.  
doi:10.1007/s13312-017-1047-9
- 15 Engberg E, Alen M, Kukkonen-Harjula K, *et al.* Life events and change in leisure time physical activity: a systematic review. *Sports Med Auckl NZ* 2012;**42**:433–47.  
doi:10.2165/11597610-000000000-00000

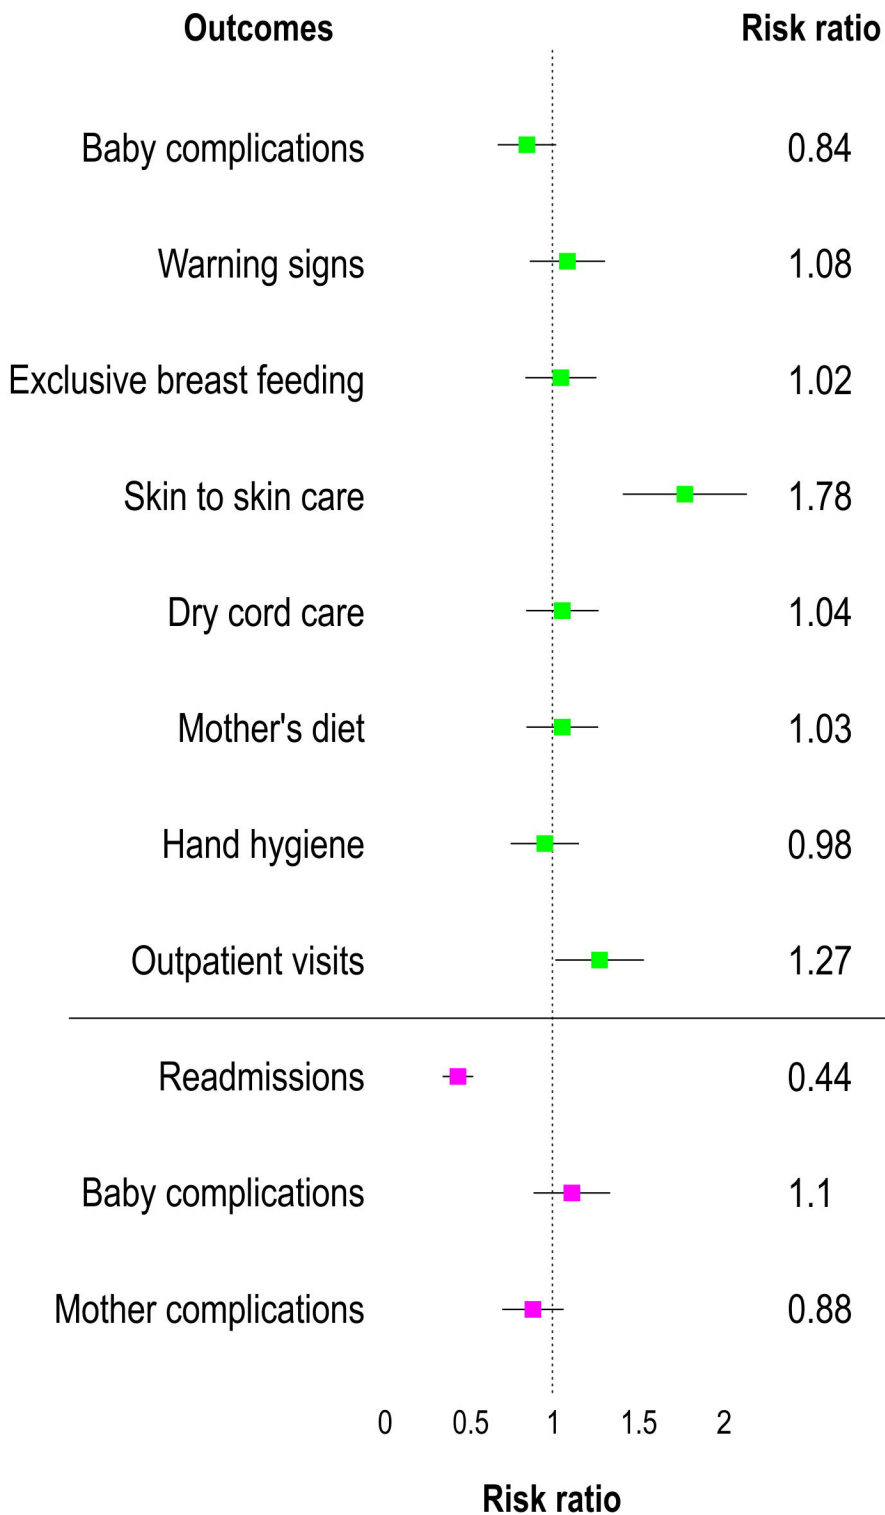

Source: https://www.medrxiv.org/content/medrxiv/early/2021/03/24/2021.03.15.21252605.full.pdf
